# Supplementary material for: The Members of the Highly Diverse Crassostrea gigas Integrin Family Cooperate for the Generation of Various Immune Responses
Source: Front Immunol. 2020 Jul 23;11:1420. doi: 10.3389/fimmu.2020.01420 (PMC7390872; doi:10.3389/fimmu.2020.01420)
Supplement: Supplementary file 1 [file Table_1.xls]

## Sheet: Sheet1
Table S1a. Species, proteins and genbank accession numbers of α integrins used in phylogenetic reconstructions
Species	Name	Accession No.
Homo Sapiens	α1	NP_852478.1
	α2	NP_002194.2
	α3	NP_002195.1
	α4	NP_000876.3
	α5	NP_002196.2
	α6	NP_001073286.1
	α7	AAC18968.1
	α8	NP_003629.1
	α9	NP_002198.2
	α10	NP_003628.2
	α11	NP_001004439.1
	αIIb	EAW51595.1
	αD	NP_005344.2
	αE	NP_002199.3
	Αl	NP_002200.2
	αM	NP_001139280.1
	αV	NP_002201.1
	αX	NP_000878.2
Anopheles gambiae	int1	XP_310816.5
	int2	XP_311131.5
	int3	XP_313576.4
Drosophila melanogaster	αPS1	CAA52155.1
	αPS2	AAC12788.1
	αPS3	NP_523750.2
	αPS4	NP_611025.2
	αPS5	NP_611808.1
Crassostrea gigas	CGI_10005638	EKC20678.1
	CGI_10008246	EKC29903.1
	CGI_10012568	EKC38514.1
	CGI_10013155	EKC18351.1
	CGI_10021391	EKC41508.1
	CGI_10023513	EKC28745.1
	CGI_10010727	EKC18839.1
	CGI_10012356	EKC18458.1
Nematostella vectensis	α-1	XP_001641435
Table S1b. Species, proteins and genbank accession numbers of β integrins used in phylogenetic reconstructions
Species	Name	Accession No.
Caenorhabditis elegans	β pat3	NP_497787.1
Biomphalaria glabrata	β	AAC67503.1
Anopheles gambiae	β int1	CAC00630.1
	βV	AAM11657.1
Drosophila melanogaster	βPS3	AAA28714.1
	βV	NP_523608.2
Litopenaeus vannamei	β-1	ADK56123.1
	β-2	ACY82398.1
Crassostrea gigas	CGI_10012179	EKC18490.1
	CGI_10012180	EKC18491.1
	CGI_10014761	EKC35462.1
Nematostella vectensis	NvItgβ-1	XP_001641468
	NvItgβ-2	XP_001627336
	NvItgβ-3	XP_001637894
	NvItgβ-4	XP_001621822
Homo Sapiens	β1	CAD97649
	β2	AAP88748
	β3	AAA60122
	β4	CAA37656
	β5	AAP88764
	β6	AAA36122
	β7	AAB23688
	β8	AAA36034
