# Supplementary material for: The Members of the Highly Diverse Crassostrea gigas Integrin Family Cooperate for the Generation of Various Immune Responses
Source: Front Immunol. 2020 Jul 23;11:1420. doi: 10.3389/fimmu.2020.01420 (PMC7390872; doi:10.3389/fimmu.2020.01420)
Supplement: Supplementary file 2 [file Table_2.xls]

## Sheet: Sheet1
Table S2. The detailed information of cloned integrin genes from C. gigas genome.
Gene	Description	FL of cDNA (bp)	Encoded amino acid (aa)	MW (kDa)	pI	Cloned cDNA (bp)	Start	Stop	Identity (%)	Recombinant fragment (bp)	Encoded fragment (aa)	MW (kDa)
CGI_10012179	β	2622	1037	115.05	5.67	643	124	766	99.7	642	214	23.82
CGI_10014761	β	2076	1028	115.39	6.71	663	346	1008	96.8	663	221	24.49
CGI_10012180	β	1644	1000	110.48	5.35	901	282	1182	99	900	300	33.14
CGI_10013155	α	3114	1078	117.81	4.74	832	488	1319	97.1	828	276	30.03
CGI_10012356	α	3087	1341	150.25	5.31	722	459	1180	98.6	723	241	27.1
CGI_10021391	α	3003	809	88.22	5.2	544	36	579	98.2	543	181	19.99
CGI_10023513	α	3237	685	75.78	5.41	422	580	1001	96.2	417	139	15.27
CGI_10010727	α	4026	585	65.23	5.91	954	2611	3966	99.8	909	303	33.69
CGI_10008246	α	2430	873	97.23	4.95	382	760	1141	100	381	127	13.55
CGI_10012568	α	2058	691	76.29	4.81	976	731	1706	97.7	975	325	36.12
CGI_10005638	α	1758	547	60.64	5.04	661	7	667	98.5	660	220	23.79
